# Supplementary material
Source: publisher figshare collection journal article supplement (https://acs.figshare.com/ndownloader/files/4296625)
Supplement: Supplementary file 1 [file 4296625]

## Supporting Information

# Synthetic Chemoselective Rewiring of Cell Surfaces: Generation of Three-Dimensional Tissue Structures

*Debjit Dutta, Abigail Pulsipher, Wei Luo, and Muhammad N. Yousaf\**

Department of Chemistry and Carolina Center for Genome Science, University of North Carolina at Chapel Hill, Chapel Hill, North Carolina 27599-3290

CORRESPONDING AUTHOR: Muhammad N. Yousaf\*; Tel: (919) 966-5074; Fax: (919) 962-2388;  
Email: mnyousaf@email.unc.edu

### Table of Contents

|                                                                                                                    |      |
|--------------------------------------------------------------------------------------------------------------------|------|
| 1. Synthetic scheme (Scheme S1) and procedure of O-dodecyloxyamine <b>A</b> .....                                  | S2   |
| 2. <sup>1</sup> H NMR Spectra of 2-(dodecyloxy)isoindoline-1,3-dione <b>B</b> and O-dodecyloxyamine <b>A</b> ..... | S3-4 |
| 3. 3D Spheroid assemblies: Cell size and composition control (Figure S1).....                                      | S5   |
| 4. SEM Characterization of 3D spheroid assemblies (Figure S2).....                                                 | S6   |
| 5. Confocal images of 3D multi-layered co-culture tissue structures (Figure S3).....                               | S7   |
| 6. Trypan blue cell viability assay (Figure S4).....                                                               | S8   |

**Scheme S1.** Synthesis of *O*-dodecyloxyamine<sup>a</sup> (**A**)

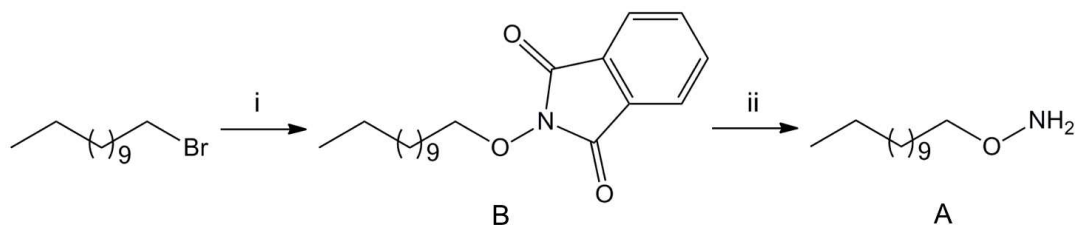

<sup>a</sup> Reagents and conditions. (i) N-hydroxyphthalimide (1.5 eq), NaHCO<sub>3</sub> (1.5 eq), DMF, reflux, 80 °C, 12 h; 87 % and (ii) hydrazine (6 eq), dry DCM, N<sub>2</sub>, 12 h; 74 %.

**2-(dodecyloxy)isoindoline-1,3-dione (B).** To a solution of N-hydroxyphthalimide (1.96 g, 12.04 mmol, 1.5 eq) and sodium bicarbonate (10.11 g, 12.04 mmol, 1.5 eq) in DMF (20 mL) at 80°C was added 1-bromododecane (1.93 mL, 8.02 mmol). The mixture was refluxed and stirred for 12 h. The reaction was diluted with DCM and washed with H<sub>2</sub>O (6 x 50 mL), 1 M NaHCO<sub>3</sub> (3 x 50 mL), and H<sub>2</sub>O (2 x 50 mL), dried over MgSO<sub>4</sub>, and concentrated to afford a white solid, **B** (2.66 g, 87 %). <sup>1</sup>H NMR (400 MHz, CDCl<sub>3</sub>) δ 0.91 (m, 3H), 1.28 (bm, 16H), 1.47-1.49 (m, J = 9.2 Hz, 2H), 1.77-1.83 (m, J = 22.0 Hz, 2H), 4.20-4.23 (t, J = 13.6 Hz, 2H), 7.28-7.30, 7.75-7.77 (dm, J = 4.8, Hz, J = 5.6 Hz, 2H, 2H). (ESI) (*m/z*) [M + H<sup>+</sup>]: 332.28.

***O*-dodecyloxyamine (A).** To a solution of **B** (2.65 g, 8.00 mmol) in dry DCM (30 mL) under inert atmosphere (Ar) was slowly added hydrazine (1.53 mL, 48.00 mmol, 6 eq). Upon addition, a white precipitate immediately formed. The mixture was stirred for 12 h. The reaction was diluted with DCM and washed with H<sub>2</sub>O (6 x 50 mL), dried over MgSO<sub>4</sub>, and concentrated to afford a pale yellow oil, **A** (1.18 g, 74 %). <sup>1</sup>H NMR (400 MHz, CDCl<sub>3</sub>) δ 0.88-0.91 (t, J = 13.6 Hz, 3H), 1.28 (s, 18H), 1.57-1.60 (m, J = 14.0 Hz, 2H), 3.65-3.69 (t, J = 13.2 Hz, 2H). (ESI) (*m/z*) [M + H<sup>+</sup>]: 201.22.

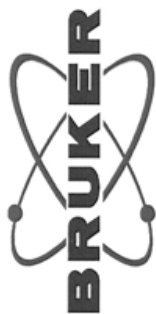

Current Data Parameters  
 Name\_ 2-(dodecyloxy)isoindoline-1,3-dione  
 PROCNO 1  
 F2 - Acquisition Parameters

Date\_ 20110426  
 Time\_ 17.43  
 INSTRUM spect  
 PROBD 5 mm QNP 1H/1  
 PULPROG zg30  
 TD 32768  
 SOLVENT CDCl3  
 NS 2  
 DS 2  
 SWH 6218.905 Hz  
 FIDRES 0.189786 Hz  
 AQ 2.6345973 sec  
 RG 181  
 DW 80.400 usec  
 DE 6.00 usec  
 TE 300.0 K  
 D1 1.00000000 sec  
 TDO 1  
 ===== CHANNEL f1 =====  
 NUC1 1H  
 P1 20.00 usec  
 PL1 -3.00 dB  
 SFO1 399.7824920 MHz  
 F2 - Processing parameters  
 SI 32768  
 SF 399.7800000 MHz  
 MDW EM  
 SSB 0  
 GB 0  
 PC 1.00

1.827  
 1.809  
 1.789  
 1.772  
 1.494  
 1.474  
 1.277  
 0.912

4.233  
 4.216  
 4.199

7.767  
 7.761  
 7.753

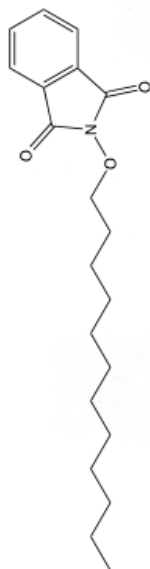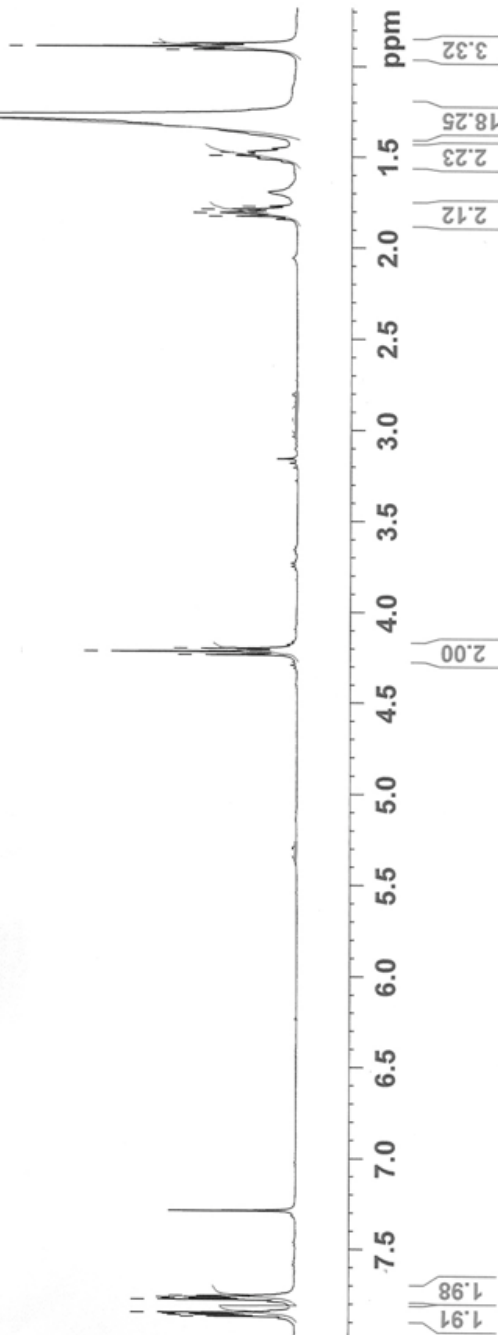

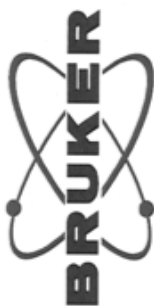

Current Data Parameters  
 NAME O-dodecyloxyamine  
 EXPNO 1  
 PROCNO 1

F2 - Acquisition Parameters  
 Date\_ 20110422  
 Time\_ 11.06  
 INSTRUM spect  
 PROBHD 5 mm QNP 1H/1  
 PULPROG zg30  
 TD 32768  
 SOLVENT CDCl3  
 NS 20  
 DS 2  
 SWH 6218.905 Hz  
 FIDRES 0.189786 Hz  
 AQ 2.6345973 sec  
 RG 203.2  
 DW 80.400 usec  
 DE 6.00 usec  
 TE 300.0 K  
 D1 1.00000000 sec  
 TD0 1

CHANNEL f1  
 NUC1 1H  
 P1 9.30 usec  
 PL1 -3.00 dB  
 SFO1 399.7824920 MHz

F2 - Processing parameters  
 SI 32768  
 SF 399.7800000 MHz  
 WDW EM  
 SSB 0  
 LB 0.30 Hz  
 GB 0  
 PC 1.00

0.880  
 0.897  
 0.914

1.276

1.567  
 1.584  
 1.601

3.687  
 3.670  
 3.654

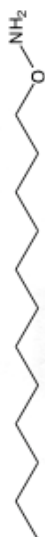

4.0 3.5 3.0 2.5 2.0 1.5 1.0 0.5 ppm

3.00

17.64

2.11

1.99

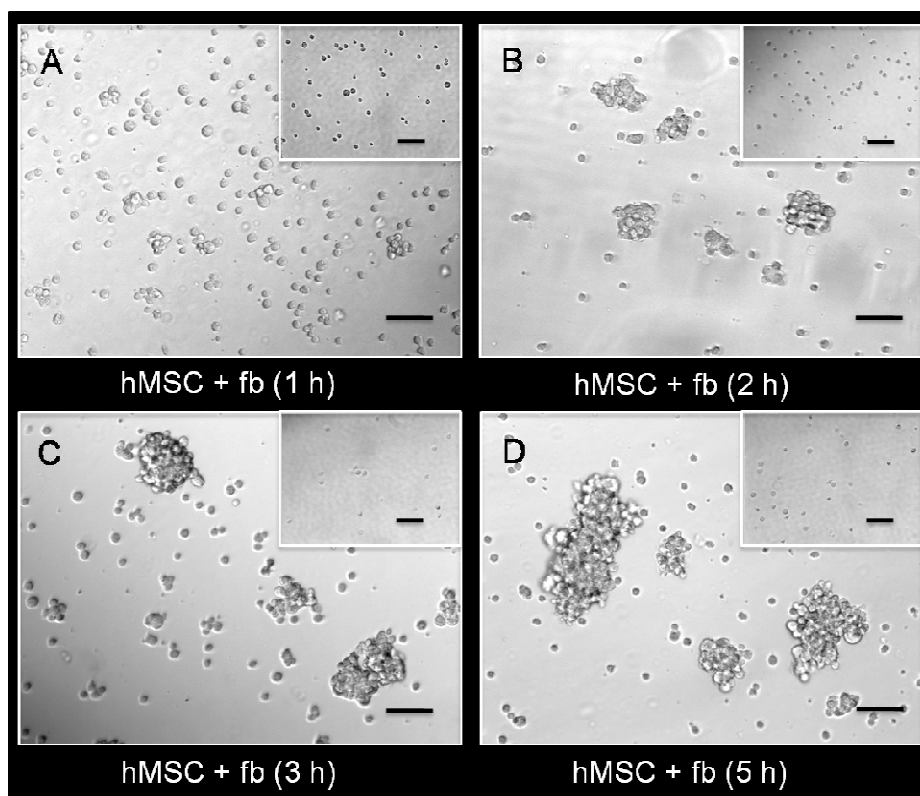

**Figure S1.** Phase contrast images representing control of spheroid size and composition. Human Mesencymal stem cells (hMSCs) were cultured with ketone-containing liposomes (16 h), resulting in fusion and display of ketone groups from the cell surface. Similarly, Swiss 3T3 albino mouse fbs were cultured with oxyamine-functionalized liposomes. The two populations were mixed together ( $10^4$  cells/mL, 1:1), allowed to react for (A) 1, (B) 2, (C) 3, and (D) 5 h, pipeted onto glass substrates, and were imaged by phase contrast microscopy. As shown, spheroids continue to grow in size as mixing duration increases. Scale bars represent 60  $\mu$ m. The insets represent control experiments where ketone-functionalized hMSCs were co-cultured with fibroblasts (not displaying oxyamine groups) for each of the corresponding time points (A) 1, (B) 2, (C) 3, and (D) 5 h, and no spheroid assembly occurs. Scale bars for all inset images represent 300  $\mu$ m.

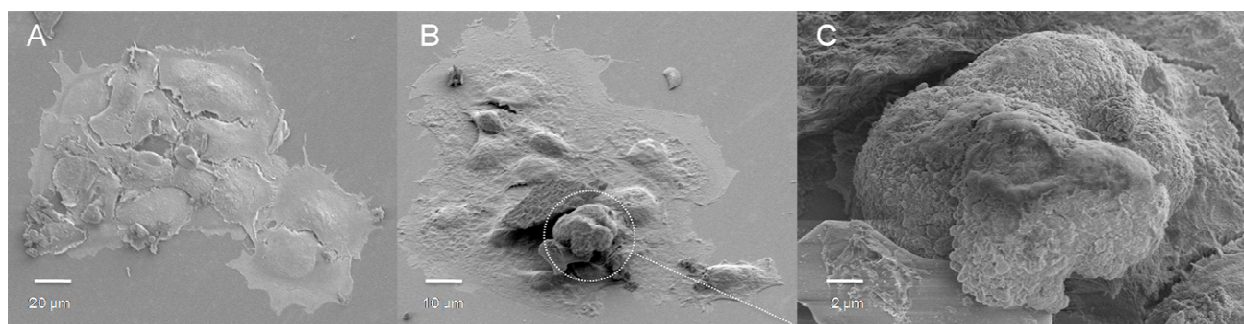

**Figure S2.** The following SEM images representing the formation of 3D spheroid assemblies in solution via chemoselective cell-surface engineering are shown. Two fibroblast populations were cultured separately with ketone- or oxyamine-containing liposomes overnight and were then mixed together for 3 h before imaging. (A and B) Low-resolution micrographs are displayed with a (C) high-resolution image of B.

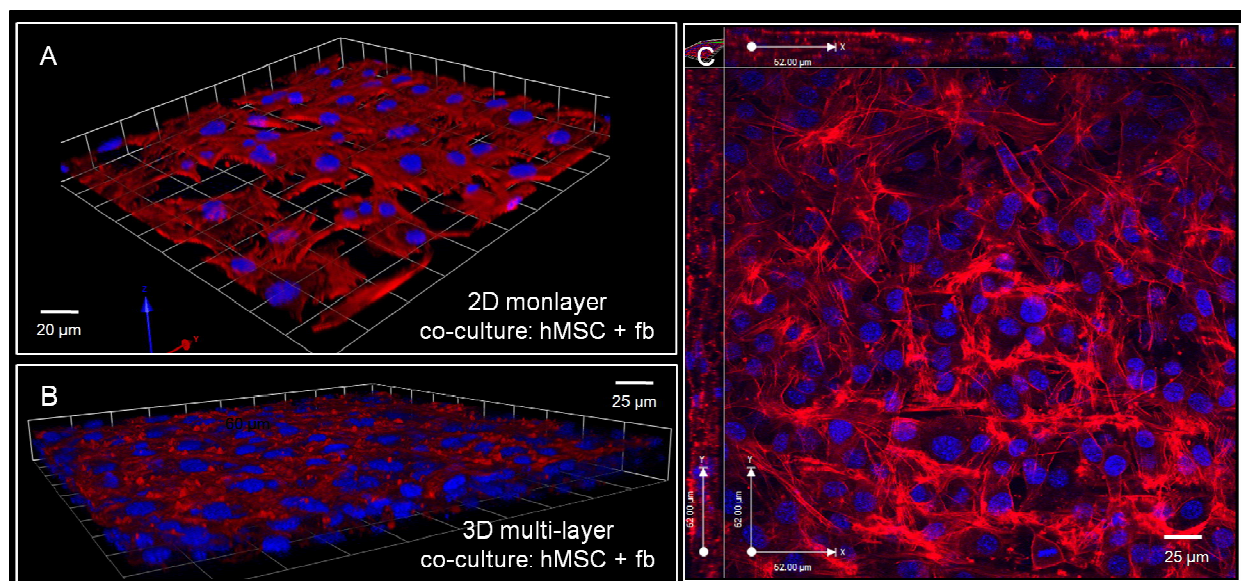

**Figure S3.** Confocal images representing images of oxime-mediated, 3D tissue-like structure formation with hMSC/fb co-cultures. Separate hMSC and fb populations were functionalized with ketone- and oxyamine-containing liposomes, respectively, resulting in membrane fusion and subsequent presentation of the ketone and oxyamine groups from cell surfaces. By culturing these cells on substrates, alternating cell population seeding layer-by-layer, gave rise to multi-layered, tissue-like cell sheets through stable oxime chemistry. (A) A 2D reconstruction image showing only a monolayer of cells after ketone-tethered hMSCs were co-cultured with non-functionalized fb. (B) A 3D reconstruction and (C) confocal micrograph displaying 3D multiple cell layers after oxyamine-presenting fb were added to hMSCs presenting ketone groups. Cells were stained with DAPI (blue, nucleus) and phalloidin (red, actin).



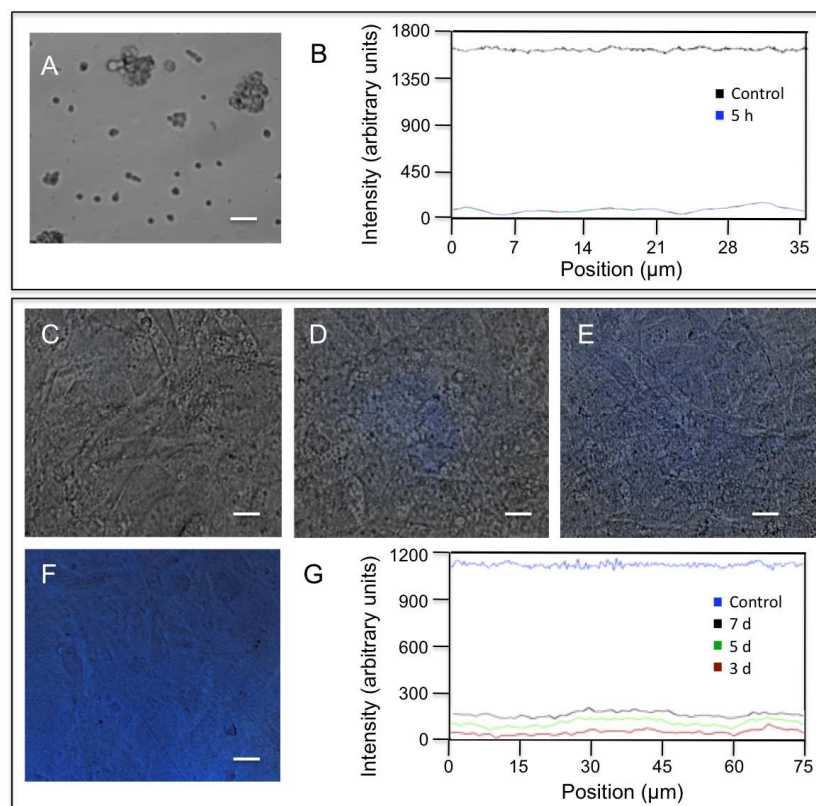

**Figure S4.** 3D spheroid and multi-layer structure cell viability, assayed with trypan blue. (A) Ketone- and oxyamine-tethered fb were mixed together in solution for 1, 2, 3, and 5 h, resulting in 3D spheroid formation and were then tested for viability using trypan blue dye (0.4 % in PBS, 2 min). (B) Trypan blue linescans (fluorescence false-colored for enhanced visualization) of the spheroids generated after 5 h of culture were compared to a control population in which spheroids were generated for 5 h, fixed with formaldehyde, and stained with trypan blue under the same conditions. Greater than 99 % of cells were determined to be viable. Similarly, 3D multi-layered tissue-like structures were generated and cultured for (C) 3 (D) 5, and (E) 7 days and tested for viability using trypan blue dye. (F) Again as a control, cells were grown in a multilayer for 7 days, then fixed with formaldehyde, and stained with trypan blue, and linescans were constructed for all samples and compared to the control. Cell viability decreased with time and number of cell layers from 3 to 5 to 7 days of culture with approximated viabilities of (C) 98, (D) 91, and (E) 84 %, respectively. The scale bars represent 60 (A) and 30 μm (C-F).
